# Supplementary material
Source: publisher site journal article supplement (https://www.spandidos-publications.com/2768/downloadSupplementary)

Figure S1. The effect of siRNA on IRE1 $\alpha$  protein expression. AGS and MKN-45 cells were transfected with IRE1 $\alpha$  siRNA or con-siRNA. The protein expression levels of IRE1 $\alpha$  were measured using western blot analysis of the whole cell lysate from AGS cells treated (A) with or (B) without IRE1 $\alpha$  siRNA transfection and MKN-45 cell lines treated (C) with or (D) without IRE1 $\alpha$  siRNA transfection. \*\*\*\*P<0.0001 vs. con-siRNA. si, small interfering; IRE1 $\alpha$ , inositol-requiring transmembrane kinase and endonuclease-1 $\alpha$ ; Con, control.

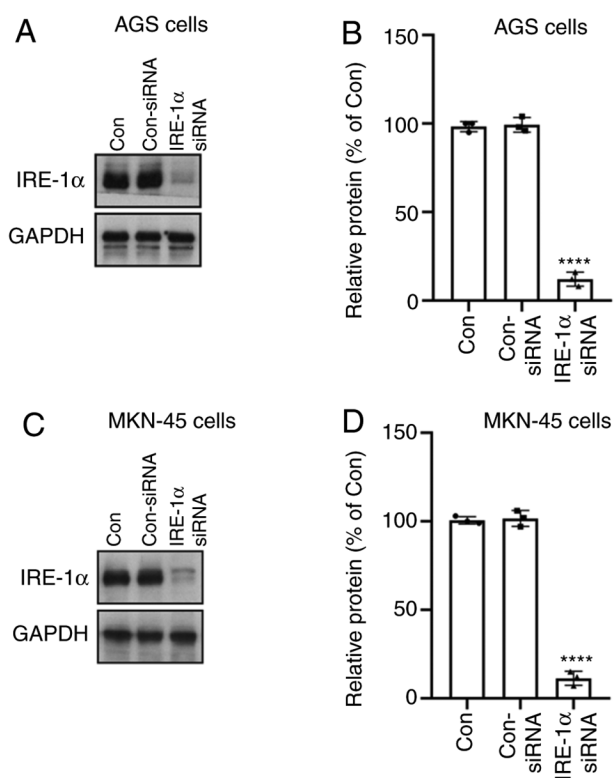

Figure S2. The effect of IRE1 $\alpha$ -siRNA on wogonoside-induced apoptosis in AGS and MKN-45 cells. The apoptotic rates were evaluated using Annexin V staining on (A) AGS cells with wogonoside treatment, (B) AGS cells with wogonoside and IRE1 $\alpha$ -siRNA treatment, (C) MKN-45 cells with wogonoside treatment and (D) MKN-45 cells with wogonoside treatment and IRE1 $\alpha$ -siRNA. Con, control. IRE1 $\alpha$ , inositol-requiring transmembrane kinase and endonuclease-1 $\alpha$ ; siRNA, small interfering RNA.

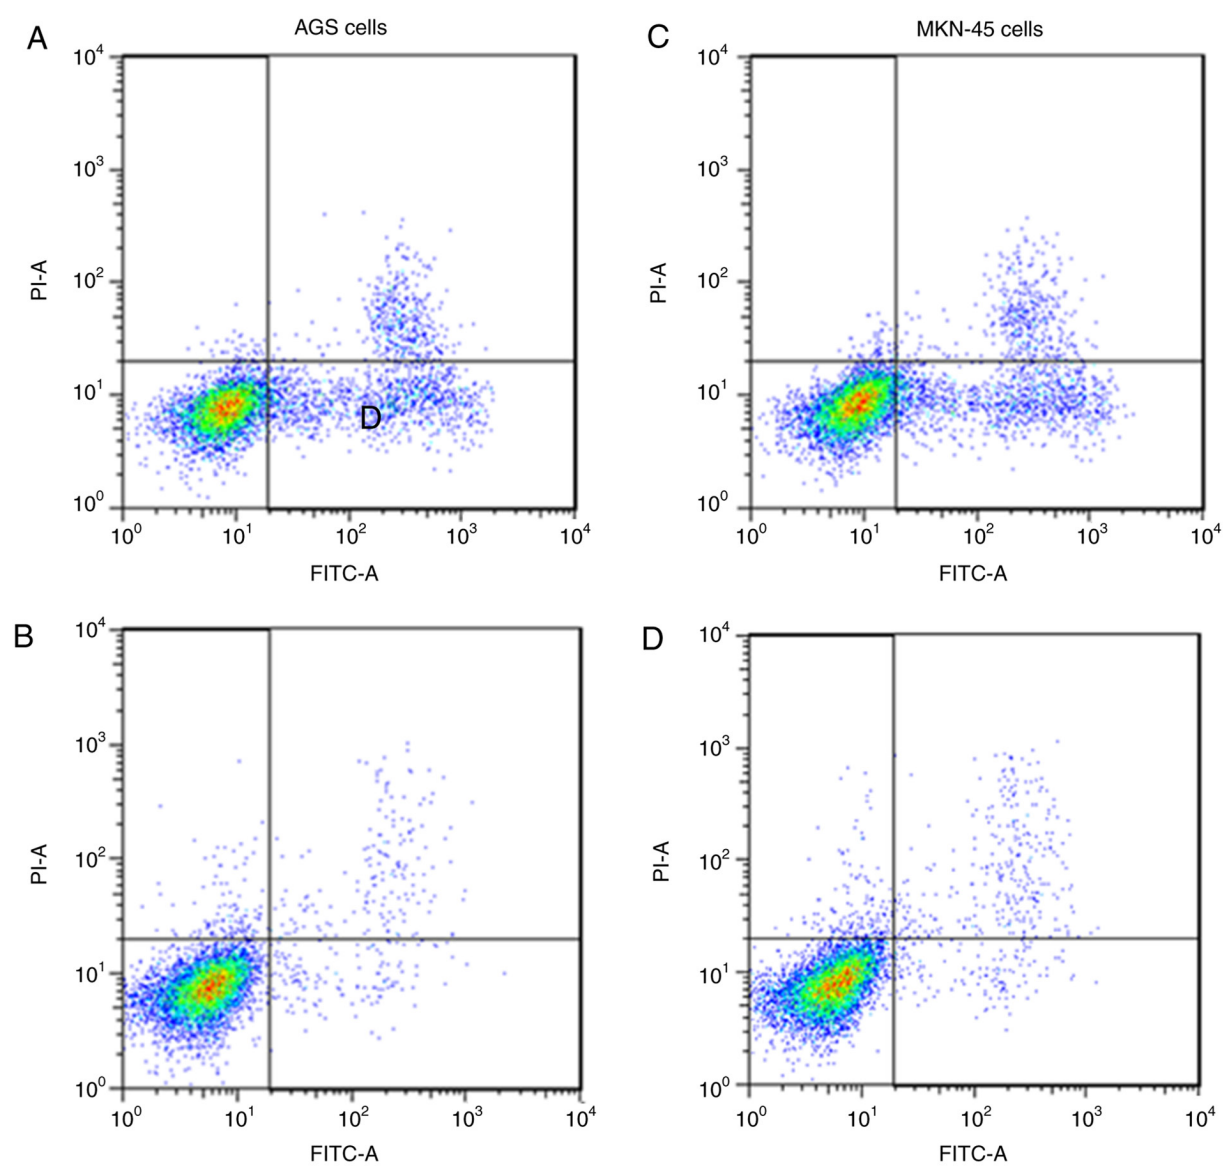

Supplement: Supplementary file 1 [file downloadSupplementary]
